# Supplementary material for: Preliminary Structure-Activity Relationship (SAR) of a Novel Series of Pyrazole SKF-96365 Analogues as Potential Store-Operated Calcium Entry (SOCE) Inhibitors
Source: PubMed Central journal article supplement (PMC5877717; doi:10.3390/ijms19030856), 2018-03-14

## SUPPLEMENTARY MATERIALS

### Preliminary SAR of a novel series of pyrazole SKF-96365 analogues as potential Store-Operated Calcium Entry (SOCE) inhibitors

Camille D. Dago<sup>1,2</sup>, Paul Le Maux<sup>1</sup>, Thierry Roisnel<sup>3</sup>, Christophe Brigaudeau<sup>4,5</sup>, Yves-Alain Bekro<sup>2</sup>, Olivier Mignen<sup>4,5,\*</sup> and Jean-Pierre Bazureau<sup>1,6,\*</sup>

<sup>1</sup> Institut des Sciences Chimiques de Rennes (ISCR), UMR CNRS 6226, groupe CORINT, Université de Rennes 1 (UR1), Campus de Beaulieu, Bât. 10A, 263 Avenue du Général Leclerc, CS 74205, 35042 Rennes Cedex, France

<sup>2</sup> Laboratoire de Chimie Bio Organique et de Substances Naturelles (LCBOSN), Université Nangui Abrogoua (UNA), BP 802, Abidjan, Côte d'Ivoire

<sup>3</sup> Institut des Sciences Chimiques de Rennes (ISCR), UMR CNRS 6226, Centre de Diffractométrie X (cdifx), Université de Rennes 1 (UR1), Campus de Beaulieu, Bât. 10B, 263 Avenue du Général Leclerc, CS 74205, 35042 Rennes Cedex, France

<sup>4</sup> Laboratoire Canalopathies & Signalisation Calcique, Inserm U1277, Université de Bretagne Occidentale (UBO), 22 Avenue Camille Desmoulins, 29200 Brest Cedex, France

<sup>5</sup> CalciScreen platform, Université de Bretagne Occidentale (UBO), 22 Avenue Camille Desmoulins, 29200 Brest Cedex, France

<sup>6</sup> S2Wave platform SFS ScanMAT, Université de Rennes 1 (UR1), Campus de Beaulieu, Bât. 10A, 263 Avenue du Général Leclerc, CS 74205, 35042 Rennes Cedex, France

Fax: +33 (0)223 236 374. Phone: +33(0)2 223 236 603.

E-mail: [jean-pierre.bazureau@univ-rennes1.fr](mailto:jean-pierre.bazureau@univ-rennes1.fr)

#### Part 1:

- <sup>1</sup>H NMR in DMSO-*d*<sub>6</sub> solution of isolated (*IR*, *IS*) 1-[β-(phenylalkoxy)-phenethyl]-1*H*-pyrazolium hydrochloride (**7a-e**)
- <sup>13</sup>C NMR in DMSO-*d*<sub>6</sub> solution of isolated (*IR*, *IS*) 1-[β-(phenylalkoxy)-phenethyl]-1*H*-pyrazolium hydrochloride (**7a-e**)

- $^1\text{H}$  NMR in  $\text{DMSO-}d_6$  solution of (*1R, 1S*) 1-[ $\beta$ -((4-methoxybenzyl)oxy)-phenethyl]-1*H*-pyrazolium hydrochloride (**7a**)

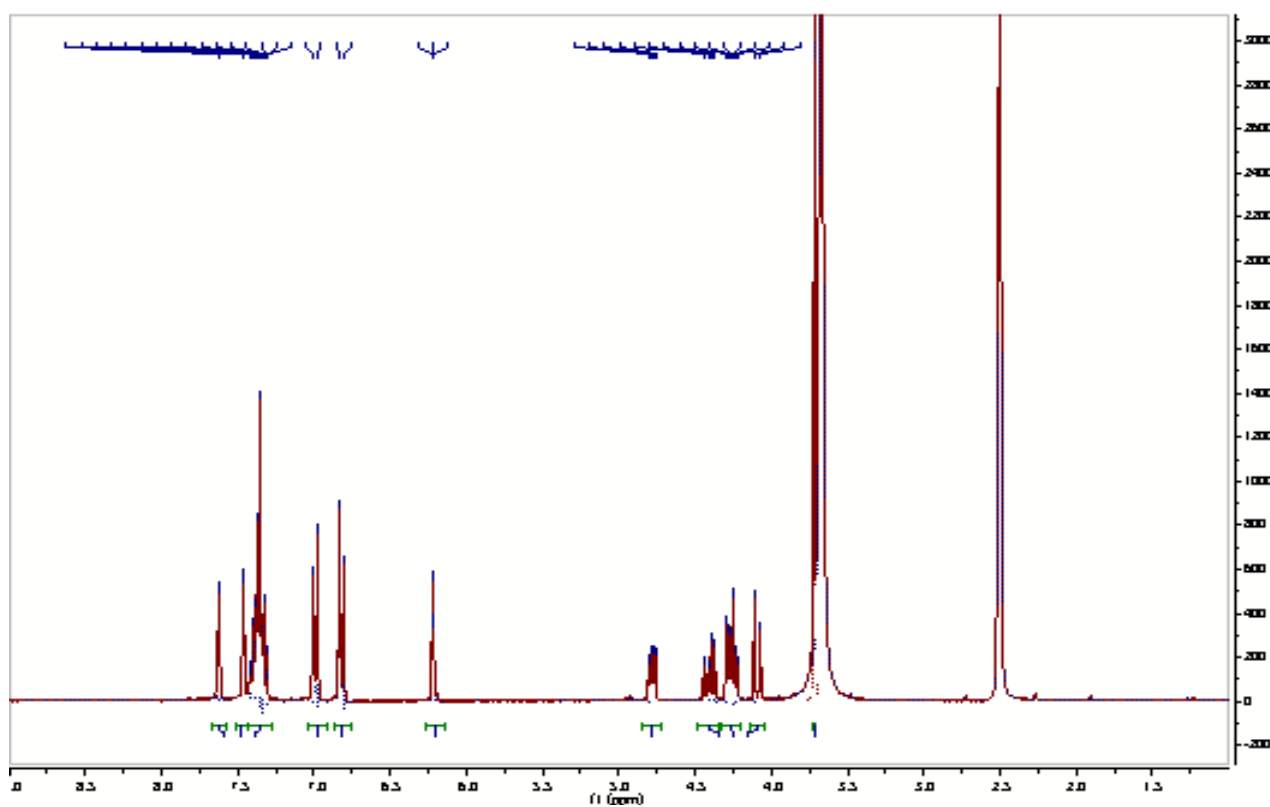

- $^{13}\text{C}$  NMR in  $\text{DMSO-}d_6$  solution of (*1R, 1S*) 1-[ $\beta$ -((4-methoxybenzyl)oxy)-phenethyl]-1*H*-pyrazolium hydrochloride (**7a**)

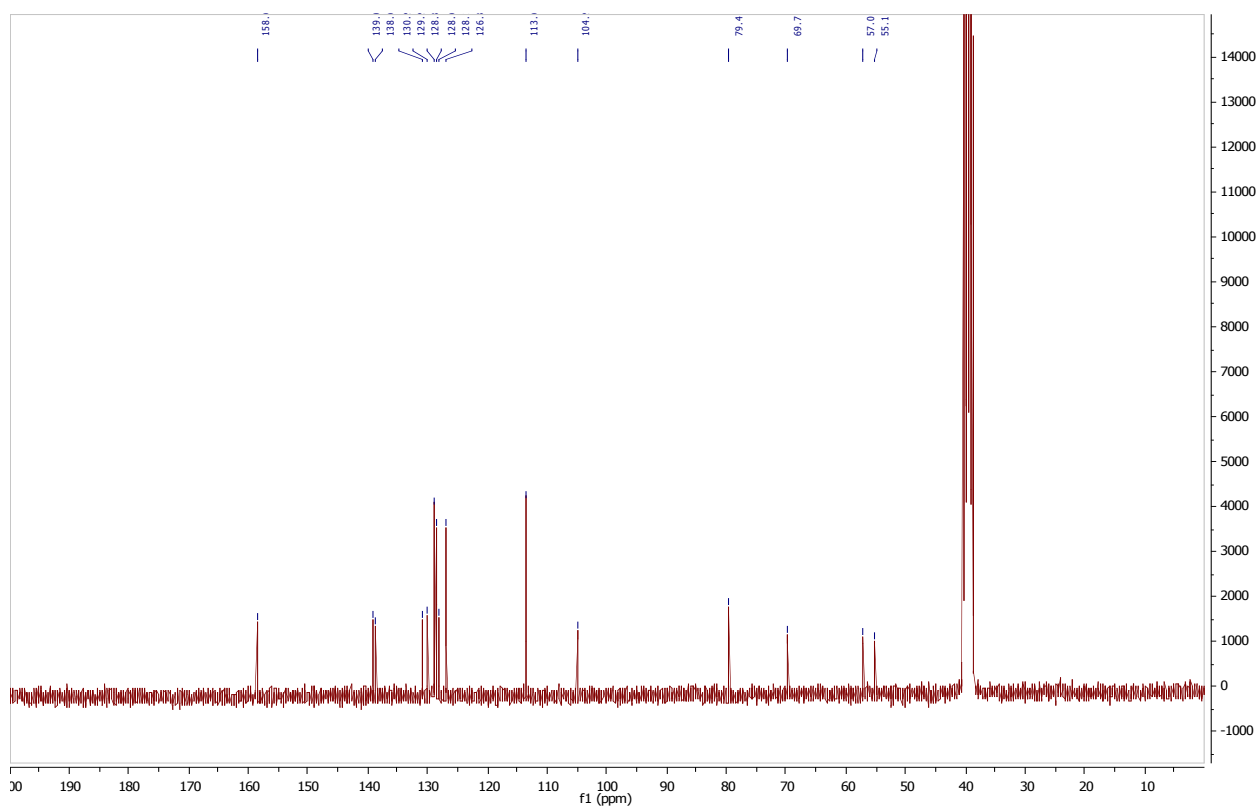

- $^1\text{H}$  NMR in  $\text{DMSO-}d_6$  solution of (*1R, 1S*) 1-[ $\beta$ -((3-(4-methoxyphenyl)propyl)oxy)-phenethyl]-1*H*-pyrazolium hydrochloride (**7b**)

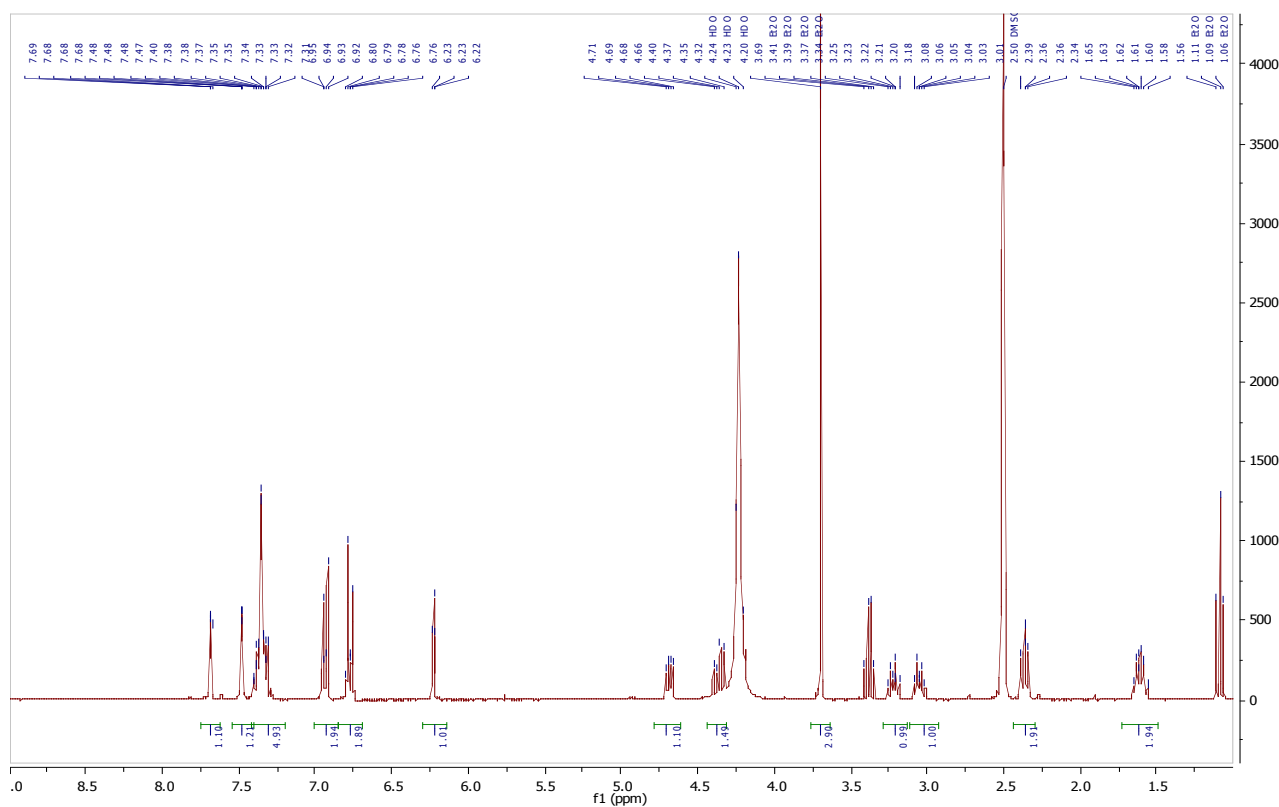

- $^{13}\text{C}$  NMR in  $\text{DMSO-}d_6$  solution of (*1R, 1S*) 1-[ $\beta$ -((3-(4-methoxyphenyl)propyl)oxy)-phenethyl]-1*H*-pyrazolium hydrochloride (**7b**)

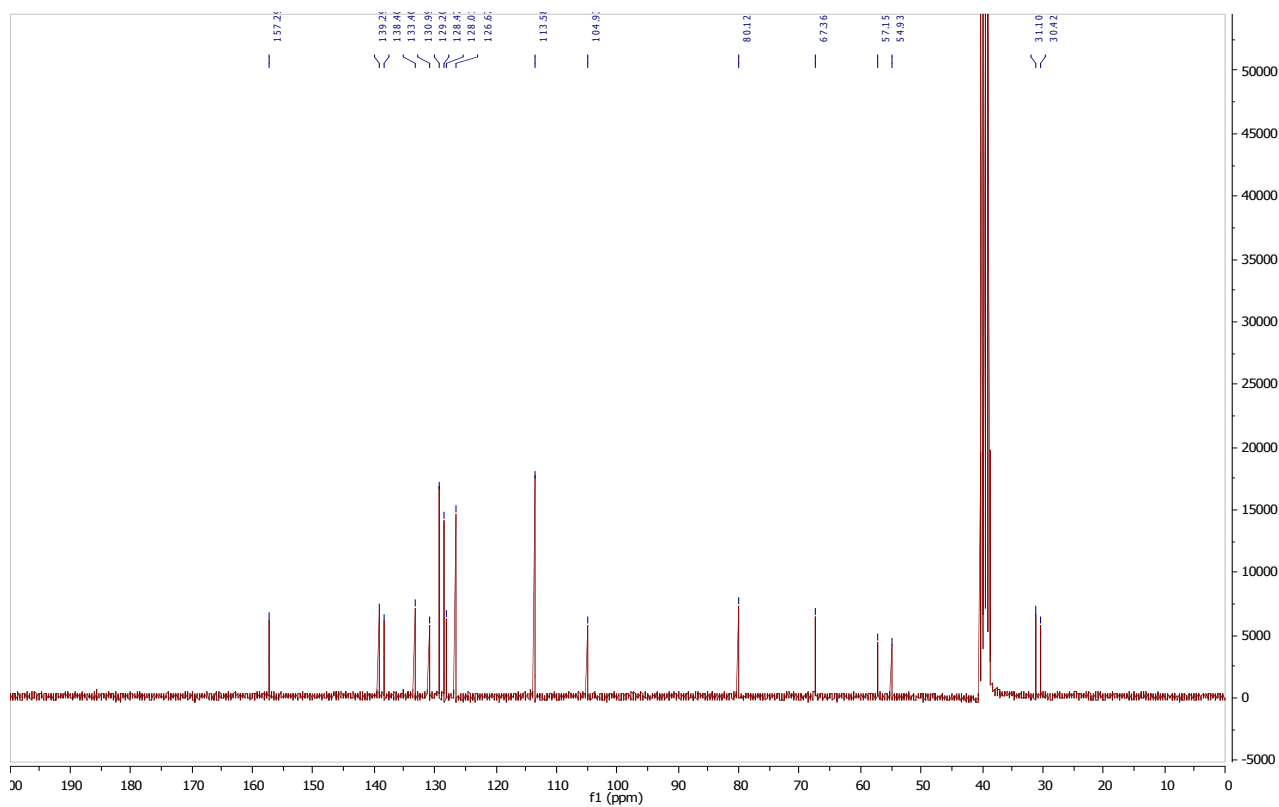

- $^1\text{H}$  NMR in  $\text{DMSO-}d_6$  solution of (*IR*, *IS*) 1-[ $\beta$ -((4-methoxybenzyl)oxy)-(4-methoxyphenethyl)]-1*H*-pyrazolium hydrochloride (**7c**)

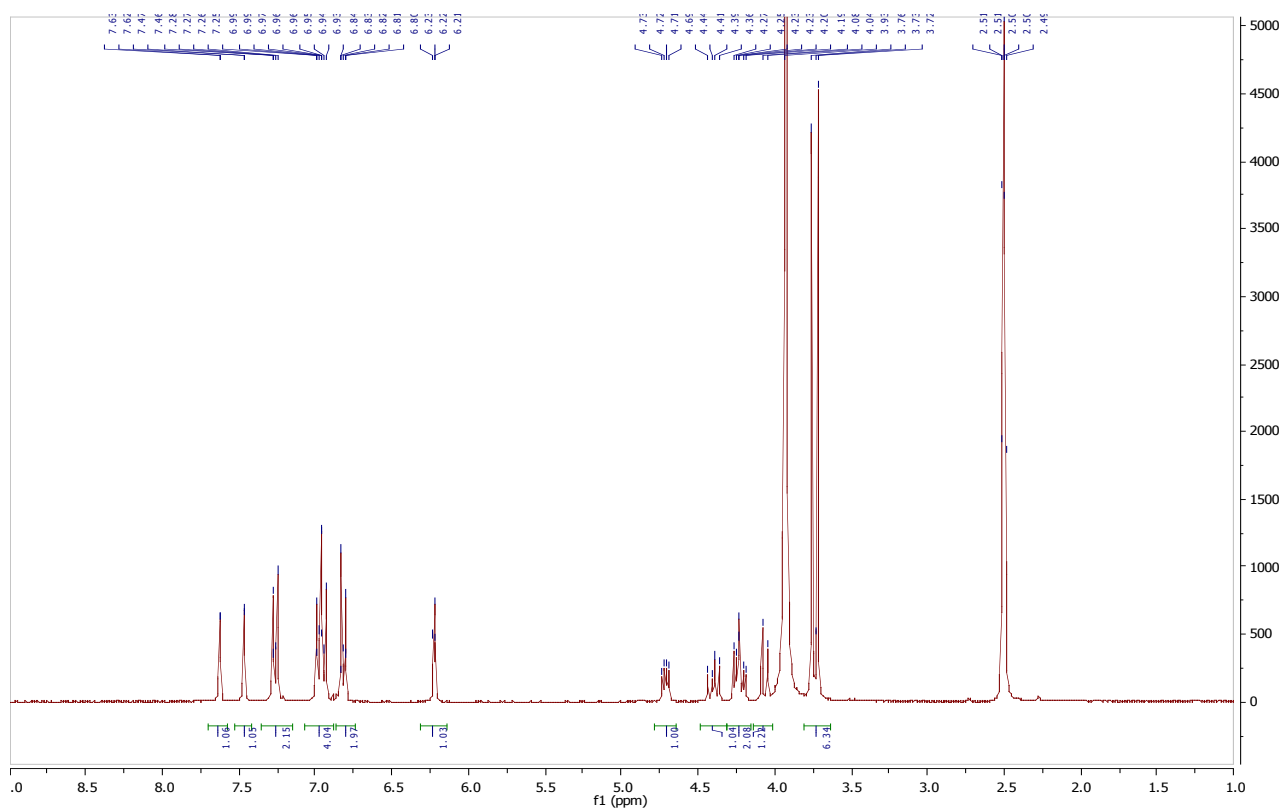

- $^{13}\text{C}$  NMR in  $\text{DMSO-}d_6$  solution of (*IR*, *IS*) 1-[ $\beta$ -((4-methoxybenzyl)oxy)-(4-methoxyphenethyl)]-1*H*-pyrazolium hydrochloride (**7c**)

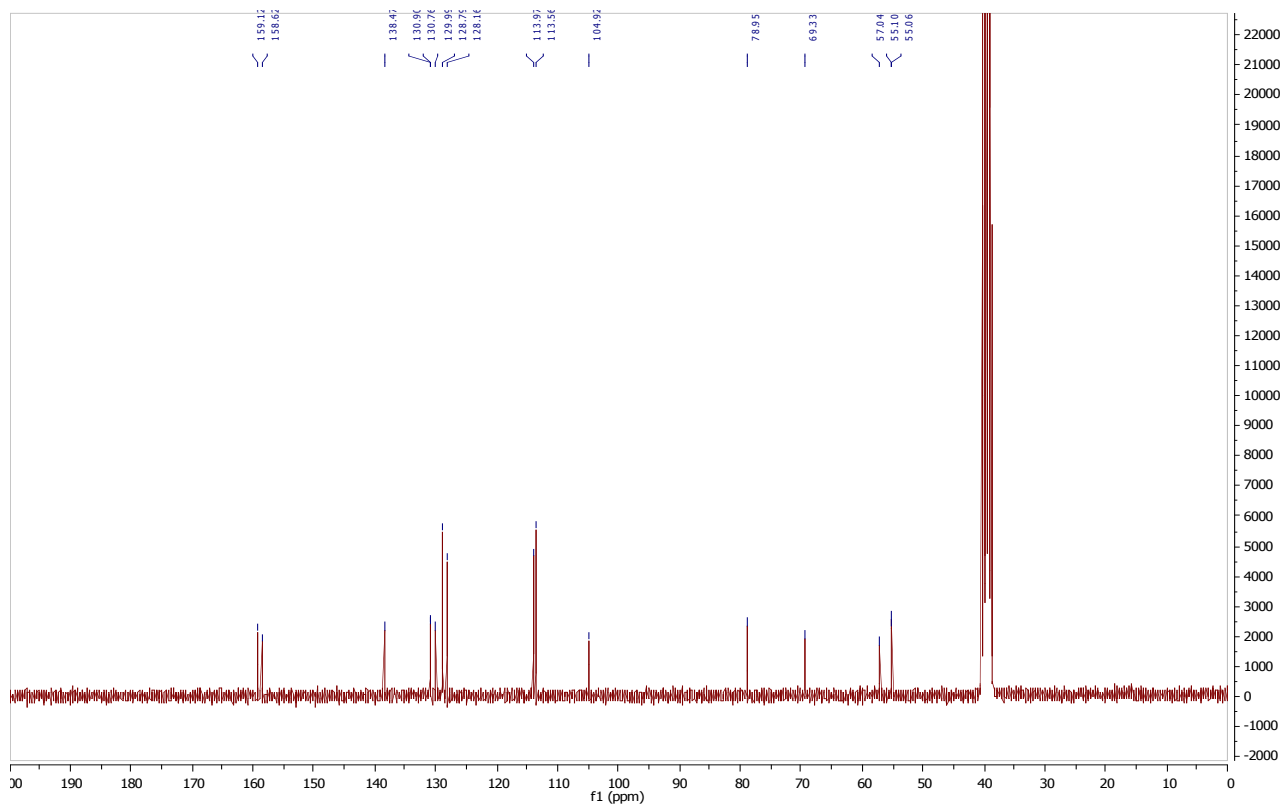

- $^1\text{H}$  NMR in  $\text{DMSO-}d_6$  solution of (*IR*, *IS*) 1-[ $\beta$ -((4-methoxyphenyl)-(3-(4-methoxyphenyl)propoxyethyl)]-1*H*-pyrazolium hydrochloride (**7d**)

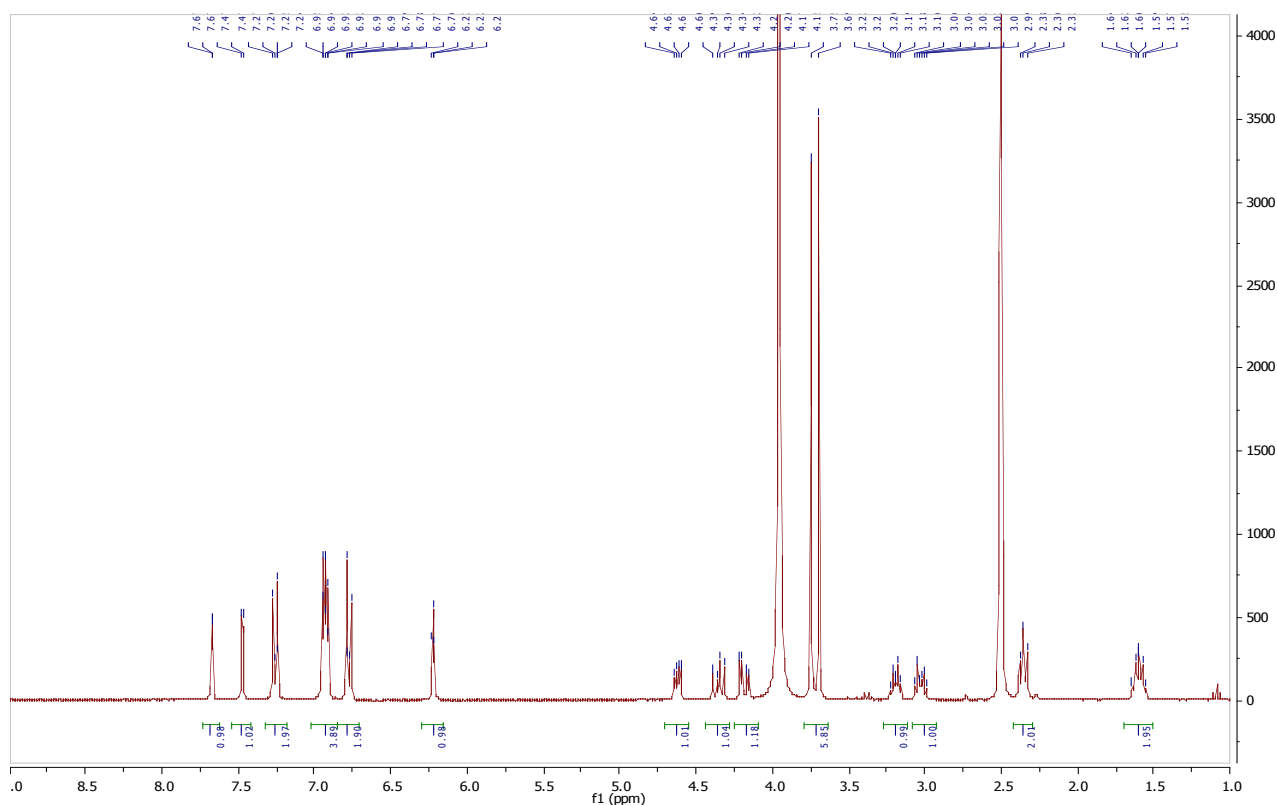

- $^{13}\text{C}$  NMR in  $\text{DMSO-}d_6$  solution of (*IR*, *IS*) 1-[ $\beta$ -((4-methoxyphenyl)-(3-(4-methoxyphenyl)propoxyethyl)]-1*H*-pyrazolium hydrochloride (**7d**)

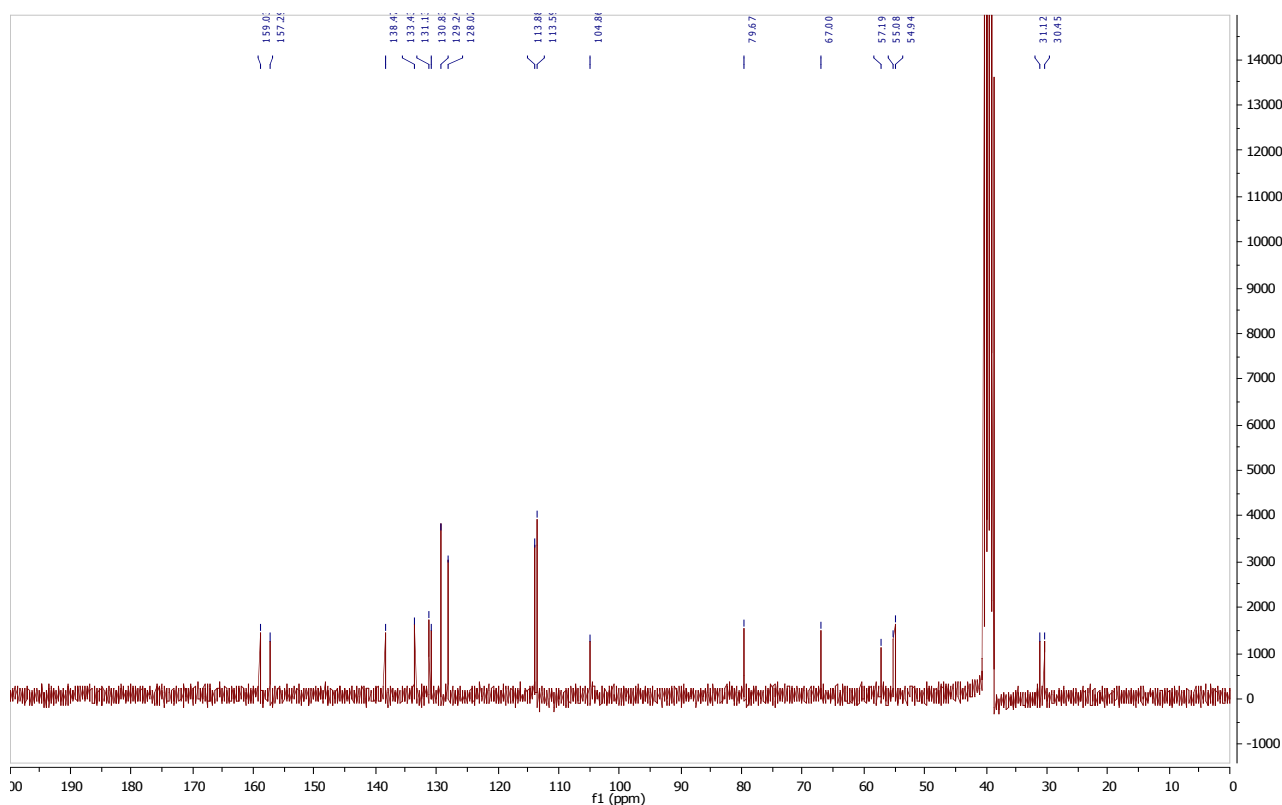



## SUPPLEMENTARY MATERIALS

### Preliminary SAR of a novel series of pyrazole SKF-96365 analogues as potential Store-Operated Calcium Entry (SOCE) inhibitors

Camille D. Dago<sup>1,2</sup>, Paul Le Maux<sup>1</sup>, Thierry Roisnel<sup>3</sup>, Christophe Brigaudeau<sup>4,5</sup>, Yves-Alain Bekro<sup>2</sup>,  
Olivier Mignen<sup>4,5,\*</sup> and Jean-Pierre Bazureau<sup>1,6,\*</sup>

<sup>1</sup> Institut des Sciences Chimiques de Rennes (ISCR), UMR CNRS 6226, groupe CORINT, Université de Rennes 1 (UR1), Campus de Beaulieu, Bât. 10A, 263 Avenue du Général Leclerc, CS 74205, 35042 Rennes Cedex, France

<sup>2</sup> Laboratoire de Chimie Bio Organique et de Substances Naturelles (LCBOSN), Université Nangui Abrogoua (UNA), BP 802, Abidjan, Côte d'Ivoire

<sup>3</sup> Institut des Sciences Chimiques de Rennes (ISCR), UMR CNRS 6226, Centre de Diffractométrie X (cdifx), Université de Rennes 1 (UR1), Campus de Beaulieu, Bât. 10B, 263 Avenue du Général Leclerc, CS 74205, 35042 Rennes Cedex, France

<sup>4</sup> Laboratoire Canalopathies & Signalisation Calcique, Inserm U1277, Université de Bretagne Occidentale (UBO), 22 Avenue Camille Desmoulins, 29200 Brest Cedex, France

<sup>5</sup> CalciScreen platform, Université de Bretagne Occidentale (UBO), 22 Avenue Camille Desmoulins, 29200 Brest Cedex, France

<sup>6</sup> S2Wave platform SFS ScanMAT, Université de Rennes 1 (UR1), Campus de Beaulieu, Bât. 10A, 263 Avenue du Général Leclerc, CS 74205, 35042 Rennes Cedex, France

Fax: +33 (0)223 236 374. Phone: +33(0)2 223 236 603.

E-mail: [jean-pierre.bazureau@univ-rennes1.fr](mailto:jean-pierre.bazureau@univ-rennes1.fr)

#### Part 2:

- Chiral HPLC chromatograms obtained for resolution of (±)-(1*R*, 1*S*) 1-(4-methoxyphenyl)-2-(1*H*-pyrazol-1-yl)ethan-1-ol **4b** with (-)-(1*R*)-CSA and (+)-(1*S*)-CSA using the method of "half-quantities"
- Chiral HPLC chromatogram obtained for racemic (1*R*, 1*S*) 1-[β-((4-methoxyphenyl)-(3-(4-methoxyphenyl)propoxyethyl))-1*H*-pyrazolium hydrochloride (**7d**):

- Chiral HPLC analysis obtained for diastereoisomer (-)-(1S)-**4b**/(-)-(1R)-CSA:

Column: Chiracel OJ-H (250 x 4.60 mm)

Detector: UV, 220 nm

Eluent: hexane/*i*-PrOH (94:6 v/v)

Flow rate: 0.8 mL/min.

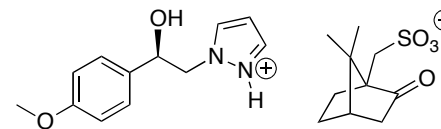

Retention time = 34.0 min.

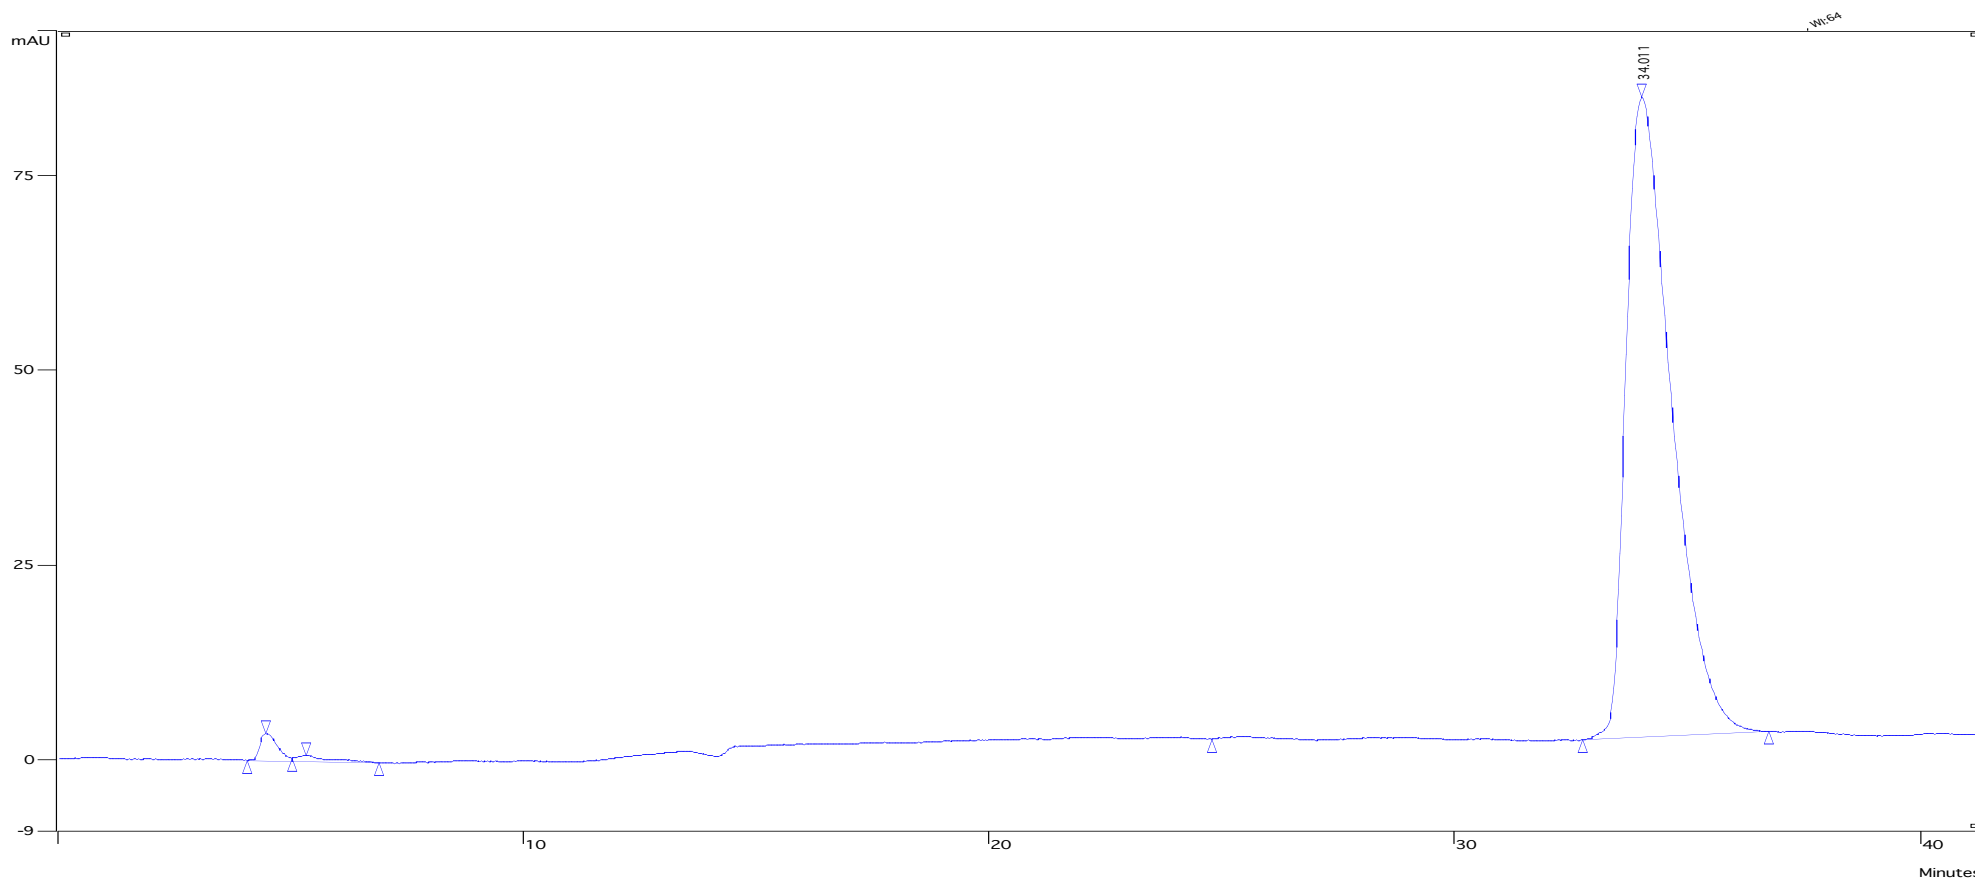



- Chiral HPLC analysis obtained for diastereoisomer (+)-(1*R*)-**4b**/(+)-(1*S*)-CSA:

Column: Chiracel OJ-H (250 x 4.60 mm)

Detector: UV, 220 nm

Eluent: hexane/*i*-PrOH (94:6 v/v)

Flow rate: 0.8 mL/min.

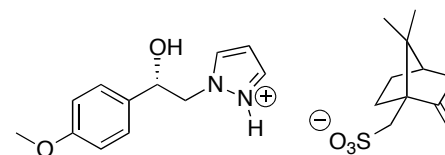

Retention time = 31.5 min.

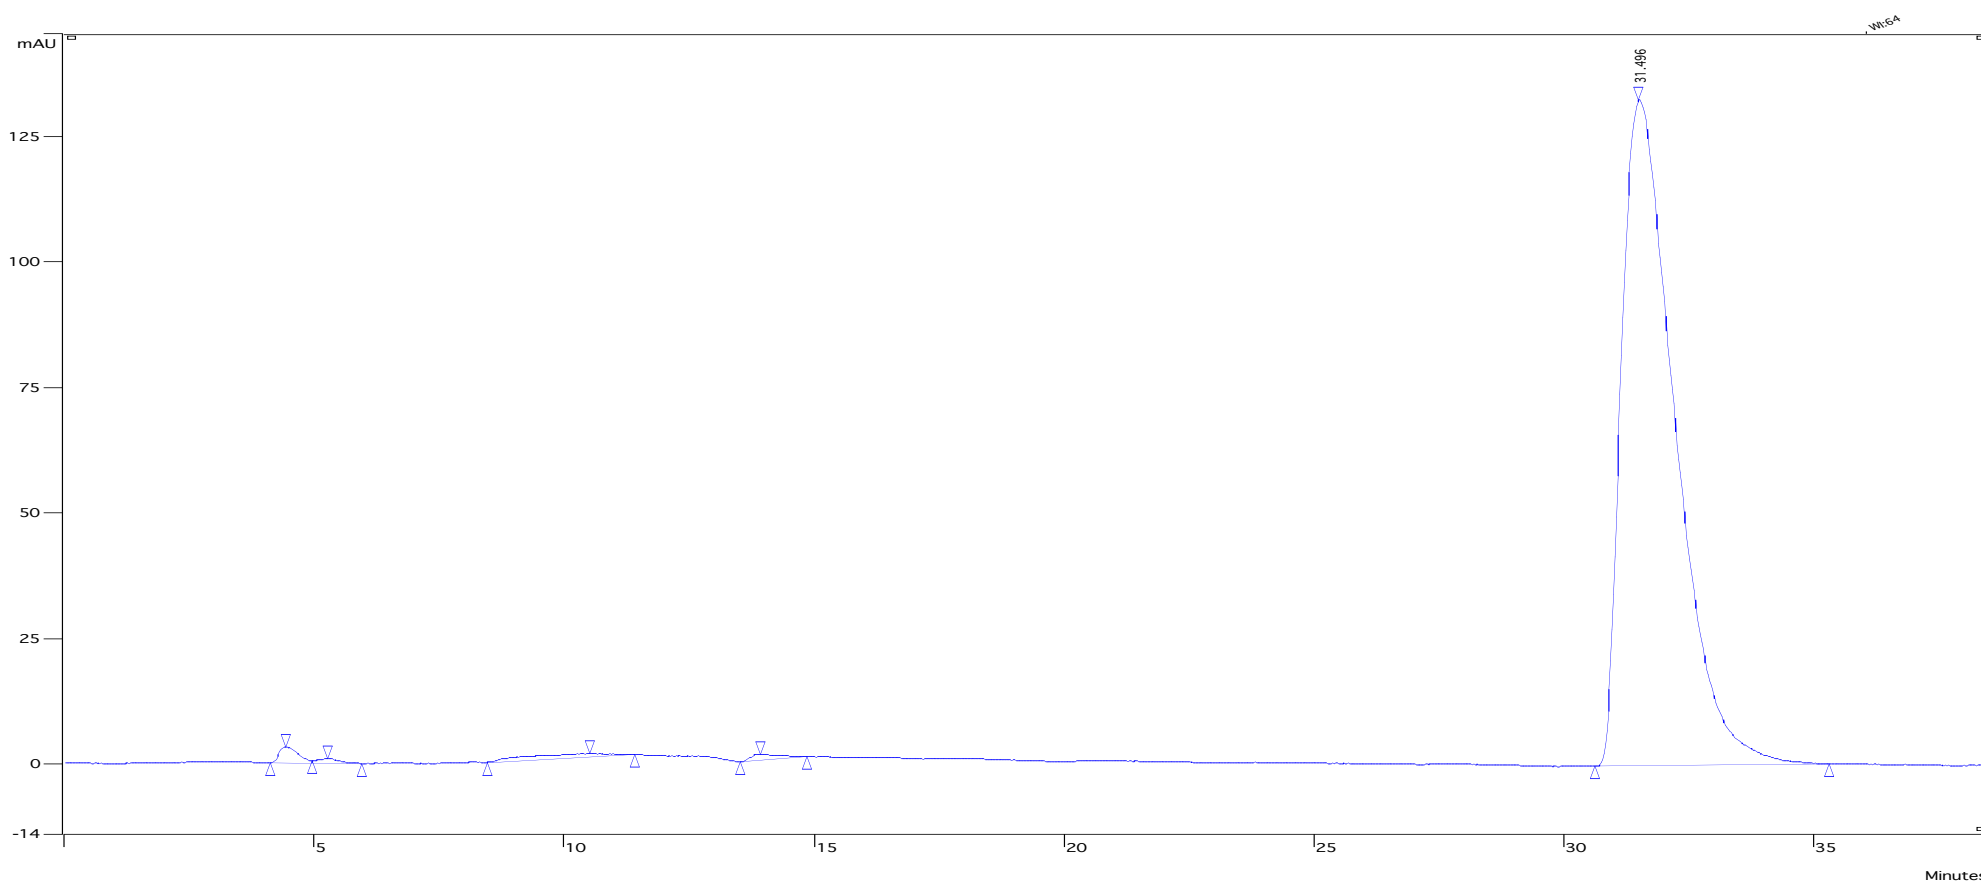

- Chiral HPLC analysis obtained for enantiomer (-)-(1S)-**4b**:

Column: Chiralcel OJ-H (250 x 4.60 mm)

Detector: UV, 220 nm

Eluent: hexane/*i*-PrOH (94:6 v/v)

Flow rate: 0.6 mL/min.

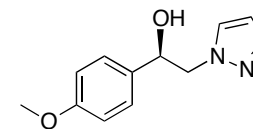

Retention time = 52.6 min.

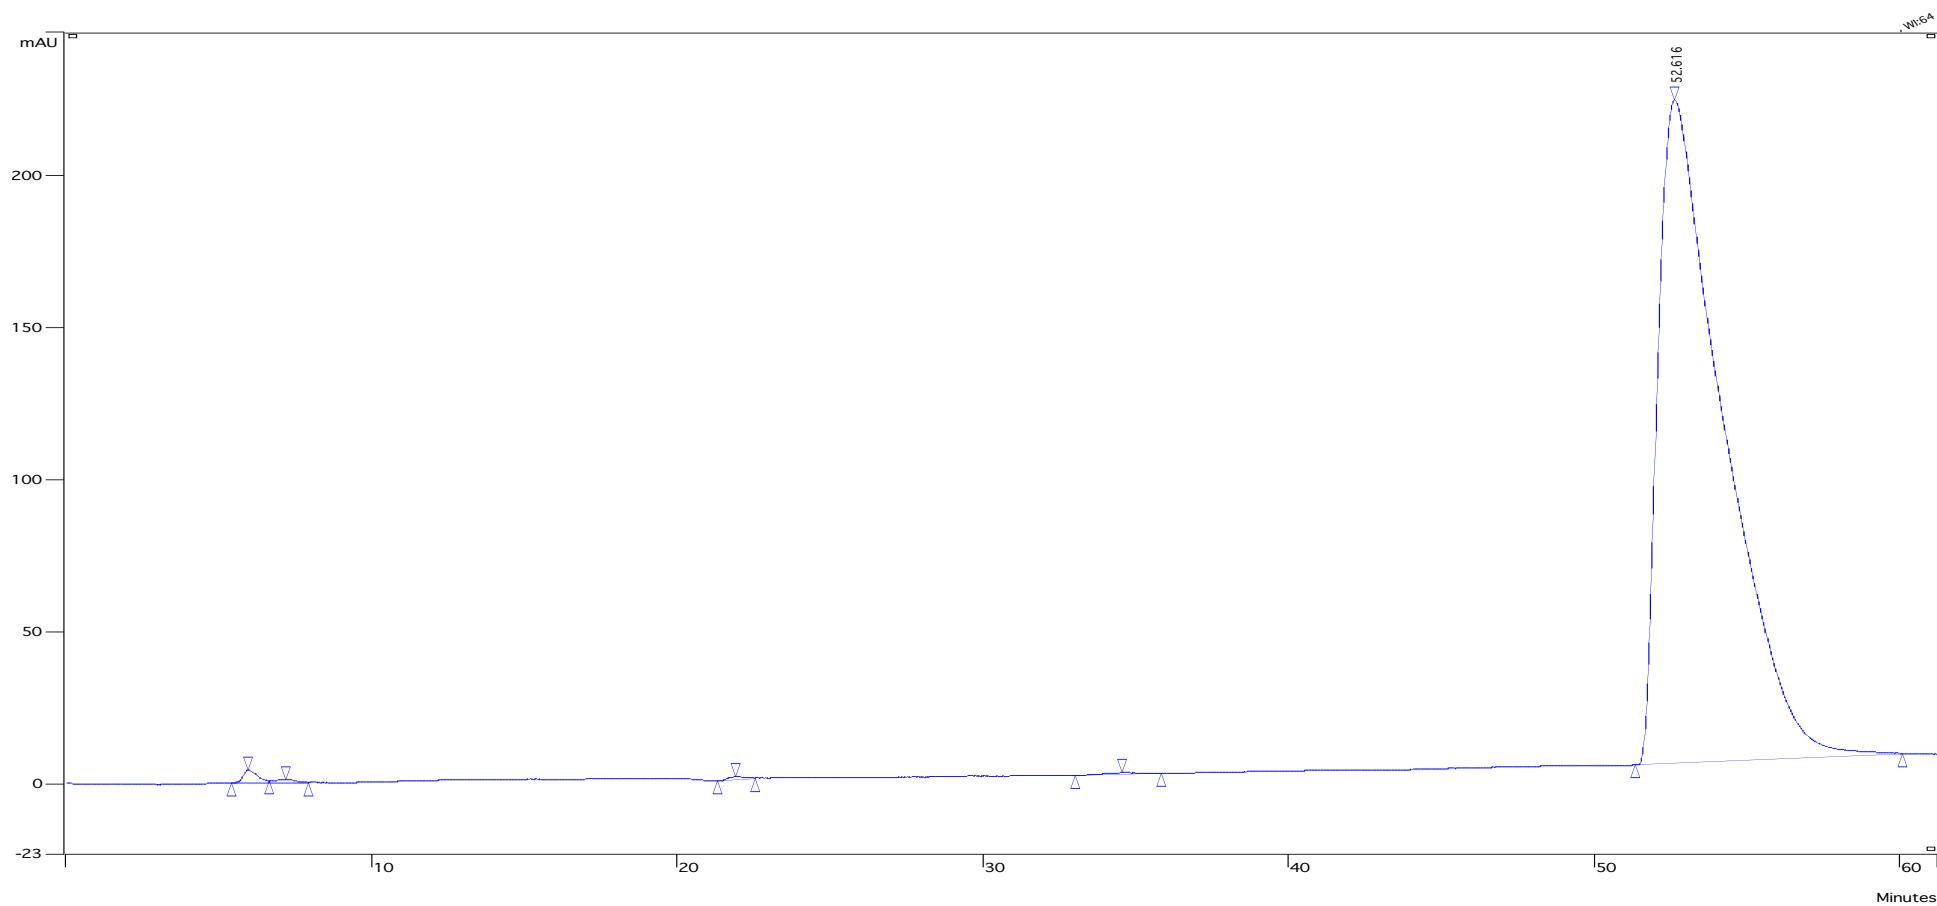

- Chiral HPLC analysis obtained for enantiomer (+)-(1*R*)-**4b**:

Column: Chiracel OJ-H (250 x 4.60 mm)

Detector: UV, 220 nm

Eluent: hexane/*i*-PrOH (94:6 v/v)

Flow rate: 0.6 mL/min.

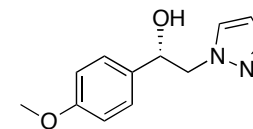

Retention time = 63.5 min.

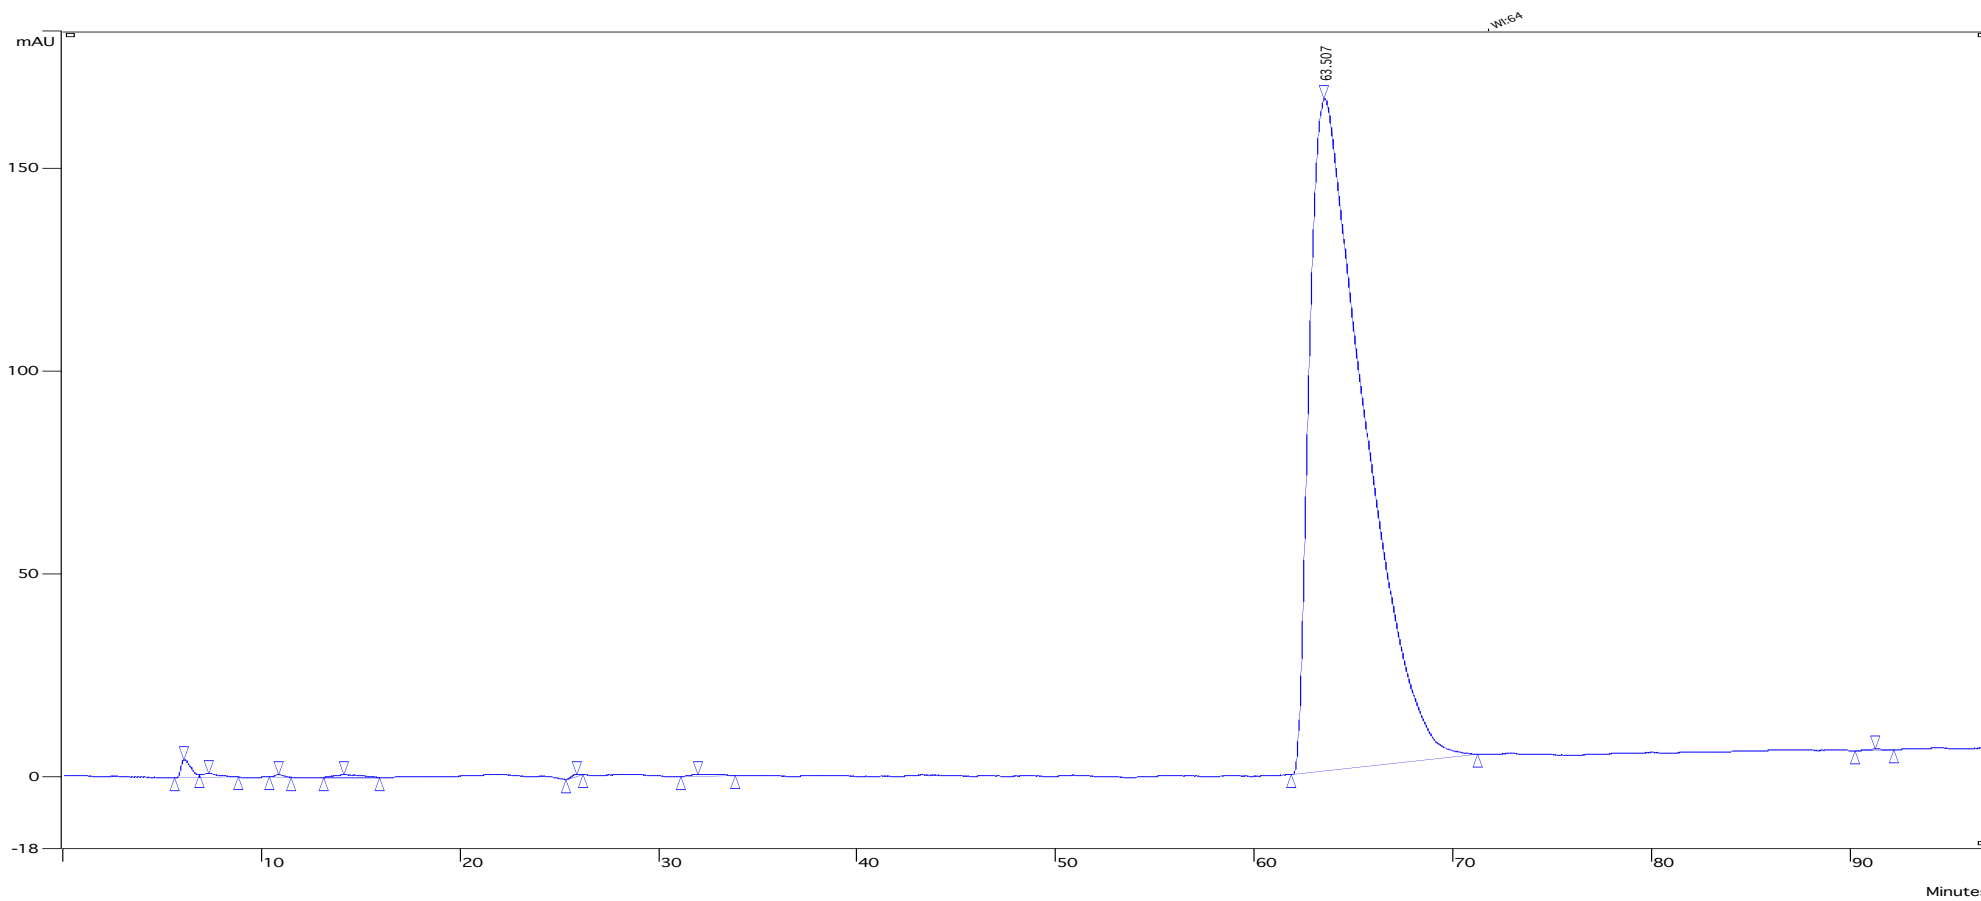

Supplement: ijms-19-00856-s001.pdf [file ijms-19-00856-s001.pdf]
